# Supplementary material
Source: MDPI journal article supplement (https://www.mdpi.com/2073-4395/13/8/2188)
Supplement: s1 [file s1]

## Supplementary Materials

**Table S1.** Correlation matrixes of ABTS free radical scavenging activity, ferric reducing antioxidant power (FRAP) and DPPH free radical scavenging activity in kale ‘Dwarf Blue Green’ microgreens under different lighting treatments.

|                         |       |       |       |
|-------------------------|-------|-------|-------|
| <b>BR<sub>638</sub></b> | ABTS  | FRAP  | DPPH  |
| ABTS                    | 1     | 0.910 | 0.889 |
| FRAP                    | 0.910 | 1     | 0.990 |
| DPPH                    | 0.889 | 0.990 | 1     |
| <b>BR<sub>665</sub></b> | ABTS  | FRAP  | DPPH  |
| ABTS                    | 1     | 0.807 | 0.869 |
| FRAP                    | 0.807 | 1     | 0.972 |
| DPPH                    | 0.869 | 0.972 | 1     |
| <b>BR</b>               | ABTS  | FRAP  | DPPH  |
| ABTS                    | 1     | 0.697 | 0.693 |
| FRAP                    | 0.697 | 1     | 0.920 |
| DPPH                    | 0.693 | 0.920 | 1     |
| <b>BRV</b>              | ABTS  | FRAP  | DPPH  |
| ABTS                    | 1     | 0.853 | 0.586 |
| FRAP                    | 0.853 | 1     | 0.814 |
| DPPH                    | 0.586 | 0.814 | 1     |
| <b>BRG</b>              | ABTS  | FRAP  | DPPH  |
| ABTS                    | 1     | 0.874 | 0.821 |
| FRAP                    | 0.874 | 1     | 0.950 |
| DPPH                    | 0.821 | 0.950 | 1     |

BR<sub>638</sub> - blue (B, peak = 447 nm), red (R<sub>638</sub>, peak = 638 nm); BR<sub>665</sub> - B and red (R<sub>665</sub>, peak = 665 nm); BR - B and red (R, peaks = 638 and 665 nm); BRV – B, R, and violet (V, peak = 405 nm); BRG - B, R and green (G, peak = 520 nm).

**Table S2.** Correlation matrixes of ABTS free radical scavenging activity, ferric reducing antioxidant power (FRAP) and DPPH free radical scavenging activity in broccoli ‘Micro Green’ microgreens under different lighting treatments.

|                         |          |          |          |
|-------------------------|----------|----------|----------|
| <b>BR<sub>638</sub></b> | ABTS     | FRAP     | DPPH     |
| ABTS                    | <b>1</b> | 0.908    | 0.779    |
| FRAP                    | 0.908    | <b>1</b> | 0.726    |
| DPPH                    | 0.779    | 0.726    | <b>1</b> |
| <b>BR<sub>665</sub></b> | ABTS     | FRAP     | DPPH     |
| ABTS                    | <b>1</b> | 0.699    | 0.487    |
| FRAP                    | 0.699    | <b>1</b> | 0.602    |
| DPPH                    | 0.487    | 0.602    | <b>1</b> |
| <b>BR</b>               | ABTS     | FRAP     | DPPH     |
| ABTS                    | <b>1</b> | 0.821    | 0.430    |
| FRAP                    | 0.821    | <b>1</b> | 0.766    |
| DPPH                    | 0.430    | 0.766    | <b>1</b> |
| <b>BRV</b>              | ABTS     | FRAP     | DPPH     |
| ABTS                    | <b>1</b> | 0.819    | 0.871    |
| FRAP                    | 0.819    | <b>1</b> | 0.822    |
| DPPH                    | 0.871    | 0.822    | <b>1</b> |
| <b>BRG</b>              | ABTS     | FRAP     | DPPH     |
| ABTS                    | <b>1</b> | 0.964    | 0.885    |
| FRAP                    | 0.964    | <b>1</b> | 0.846    |
| DPPH                    | 0.885    | 0.846    | <b>1</b> |

BR<sub>638</sub> - blue (B, peak = 447 nm), red (R<sub>638</sub>, peak = 638 nm); BR<sub>665</sub> - B and red (R<sub>665</sub>, peak = 665 nm); BR - B and red (R, peaks = 638 and 665 nm); BRV – B, R, and violet (V, peak = 405 nm); BRG - B, R and green (G, peak = 520 nm).

**Table S3.** Factor loadings, eigenvalue, variability (%), cumulative variability (%) and score for the first two principal (F1–F2) components for phytochemical constituents and antioxidant activity in microgreens under different lighting treatments during post-harvest storage in dark.

|                           | Kale   |        | Broccoli |        |
|---------------------------|--------|--------|----------|--------|
| Factors                   | F1     | F2     | F1       | F2     |
| Eigenvalue                | 5.287  | 0.910  | 4.256    | 1.317  |
| Variability (%)           | 75.534 | 13.002 | 60.800   | 18.814 |
| Cumulative %              | 75.534 | 88.536 | 60.800   | 79.614 |
| Factor Loadings           |        |        |          |        |
| ABTS                      | 0.891  | -0.133 | 0.810    | -0.497 |
| FRAP                      | 0.920  | -0.274 | 0.890    | -0.219 |
| DPPH                      | 0.852  | -0.440 | 0.846    | -0.388 |
| TP                        | 0.873  | -0.331 | 0.796    | 0.254  |
| TPC                       | 0.892  | 0.330  | 0.922    | 0.065  |
| CHL                       | 0.794  | 0.469  | 0.443    | 0.712  |
| CAR                       | 0.855  | 0.431  | 0.643    | 0.543  |
| Factor Score              |        |        |          |        |
| BR <sub>638</sub> × HD    | 2.146  | -1.587 | 1.397    | 0.301  |
| BR <sub>638</sub> × 1D-PH | 0.265  | 1.052  | -0.673   | 3.078  |
| BR <sub>638</sub> × 3D-PH | -2.260 | 0.060  | -2.480   | 1.023  |
| BR <sub>638</sub> × 5D-PH | -2.876 | -0.078 | -3.538   | 0.018  |
| BR <sub>665</sub> × HD    | 3.506  | -0.994 | 2.155    | -0.624 |
| BR <sub>665</sub> × 1D-PH | 0.778  | 1.025  | 1.530    | 0.132  |
| BR <sub>665</sub> × 3D-PH | 0.465  | 0.259  | 0.480    | -0.109 |
| BR <sub>665</sub> × 5D-PH | -1.496 | 0.027  | 0.035    | 0.192  |
| BR × HD                   | 2.671  | -1.640 | 2.779    | 0.115  |
| BR × 1D-PH                | -0.332 | 0.338  | 0.917    | 1.262  |
| BR × 3D-PH                | -1.455 | 0.547  | -1.643   | -2.322 |
| BR × 5D-PH                | -2.346 | 0.015  | -3.034   | -1.679 |
| BRV × HD                  | 6.068  | 2.452  | 2.014    | -1.910 |
| BRV × 1D-PH               | 1.441  | -1.398 | 2.945    | 0.475  |
| BRV × 3D-PH               | -1.345 | 0.406  | -0.849   | -0.174 |
| BRV × 5D-PH               | -2.179 | -0.445 | -0.419   | -0.246 |
| BRG × HD                  | 1.826  | -0.709 | 2.525    | -0.527 |
| BRG × 1D-PH               | -0.926 | 0.381  | 1.194    | 0.126  |
| BRG × 3D-PH               | -2.101 | 0.558  | -2.082   | 1.076  |
| BRG × 5D-PH               | -1.851 | -0.268 | -3.256   | -0.207 |

BR<sub>638</sub> - blue (B, peak = 447 nm), red (R<sub>638</sub>, peak = 638 nm); BR<sub>665</sub> - B and red (R<sub>665</sub>, peak = 665 nm); BR - B and red (R, peaks = 638 and 665 nm); BRV - B, R, and violet (V, peak = 405 nm); BRG - B, R and green (G, peak = 520 nm). HD – harvest day; 1D-PH – one day after the harvest; 3D-PH – three days after the harvest; 5D-PH – five days after the harvest. ABTS – ABTS free radical scavenging activity; DPPH – DPPH free radical scavenging activity; FRAP – ferric reducing antioxidant power; TP – total protein content; TPC – total phenolic content; CHL – chlorophyll a and b content; CAR – total carotenoids content.
